# Supplementary material for: Enabling solid sample analysis in liquid spectrophotometers with a 3d-printed cuvette
Source: Research Square preprint supplement (doi:10.21203/rs.3.rs-5278383/v1), 2024-11-08
Supplement: Supplementary file 1 [file fig3a_liquidandfilm.xlsx]

## Sheet: Sheet1
Wavelength [nm]	FILM	Liquid
200	0.063	0.171864
200.5	0.063251	0.170958
201	0.063439	0.166514
201.5	0.063863	0.162017
202	0.064823	0.159796
202.5	0.065407	0.155911
203	0.06656	0.152235
203.5	0.067162	0.146815
204	0.067875	0.142328
204.5	0.068574	0.136138
205	0.068971	0.122107
205.5	0.069337	0.118812
206	0.069752	0.11609
206.5	0.069306	0.113756
207	0.06921	0.11147
207.5	0.068892	0.108567
208	0.068479	0.105771
208.5	0.068145	0.10251
209	0.067574	0.099974
209.5	0.066766	0.097504
210	0.066133	0.095048
210.5	0.06536	0.092605
211	0.064713	0.090762
211.5	0.064021	0.088776
212	0.063266	0.087545
212.5	0.062388	0.086517
213	0.061699	0.085392
213.5	0.060949	0.084369
214	0.060262	0.083135
214.5	0.059717	0.081789
215	0.059079	0.080775
215.5	0.058659	0.08004
216	0.058054	0.079388
216.5	0.057434	0.078688
217	0.056939	0.077129
217.5	0.056459	0.076141
218	0.056073	0.07585
218.5	0.05578	0.076092
219	0.055379	0.076109
219.5	0.055055	0.076206
220	0.054701	0.076432
220.5	0.054424	0.076351
221	0.054193	0.076465
221.5	0.054055	0.076643
222	0.053916	0.076772
222.5	0.053962	0.076999
223	0.054024	0.077372
223.5	0.054116	0.077631
224	0.054347	0.078102
224.5	0.054454	0.07846
225	0.054593	0.079274
225.5	0.05467	0.080693
226	0.054778	0.082626
226.5	0.054839	0.084666
227	0.054978	0.086633
227.5	0.055255	0.087844
228	0.055533	0.088676
228.5	0.055594	0.089209
229	0.055656	0.089793
229.5	0.055733	0.09031
230	0.055826	0.090845
230.5	0.055749	0.091364
231	0.055733	0.091917
231.5	0.055533	0.092488
232	0.055332	0.093042
232.5	0.055086	0.093547
233	0.054901	0.093968
233.5	0.054747	0.094373
234	0.05467	0.094541
234.5	0.054424	0.094795
235	0.054055	0.094947
235.5	0.053655	0.095014
236	0.053425	0.095149
236.5	0.052903	0.095031
237	0.052536	0.095065
237.5	0.052153	0.095065
238	0.05174	0.094862
238.5	0.051419	0.094693
239	0.051007	0.094288
239.5	0.050656	0.09385
240	0.050427	0.09348
240.5	0.049909	0.092824
241	0.049544	0.09227
241.5	0.049179	0.091649
242	0.04883	0.090929
242.5	0.048602	0.09021
243	0.048268	0.089376
243.5	0.048025	0.088543
244	0.047859	0.087778
244.5	0.047541	0.086782
245	0.047313	0.085855
245.5	0.047102	0.084963
246	0.046799	0.083958
246.5	0.046663	0.083069
247	0.046391	0.082101
247.5	0.04618	0.081151
248	0.046014	0.080236
248.5	0.045833	0.079274
249	0.045667	0.078411
249.5	0.045486	0.077567
250	0.045245	0.076691
250.5	0.04514	0.075882
251	0.044914	0.075043
251.5	0.044778	0.074237
252	0.044628	0.073545
252.5	0.044478	0.072838
253	0.044312	0.072165
253.5	0.044222	0.071492
254	0.044087	0.070837
254.5	0.044027	0.07031
255	0.043967	0.069704
255.5	0.043817	0.069194
256	0.043742	0.068733
256.5	0.043621	0.068272
257	0.043486	0.067828
257.5	0.043426	0.06751
258	0.043306	0.067257
258.5	0.043216	0.066972
259	0.043142	0.066718
259.5	0.043097	0.066497
260	0.042512	0.066291
260.5	0.042497	0.066007
261	0.042602	0.065865
261.5	0.042647	0.065738
262	0.042707	0.065596
262.5	0.042767	0.065565
263	0.042767	0.065533
263.5	0.042812	0.065502
264	0.042752	0.065596
264.5	0.042737	0.065644
265	0.042782	0.065675
265.5	0.042932	0.065707
266	0.043022	0.065738
266.5	0.043336	0.065896
267	0.043606	0.066117
267.5	0.043681	0.066402
268	0.043817	0.066734
268.5	0.043952	0.067003
269	0.044072	0.067384
269.5	0.044237	0.06778
270	0.044538	0.06805
270.5	0.044703	0.068399
271	0.044974	0.068765
271.5	0.045351	0.069242
272	0.045486	0.069592
272.5	0.045757	0.070102
273	0.045969	0.070565
273.5	0.04615	0.070932
274	0.046361	0.071268
274.5	0.046603	0.07154
275	0.04689	0.071684
275.5	0.047147	0.071972
276	0.047344	0.072036
276.5	0.047737	0.072309
277	0.047965	0.072598
277.5	0.048147	0.072758
278	0.048313	0.073047
278.5	0.048253	0.073127
279	0.048404	0.073336
279.5	0.048541	0.073625
280	0.04845	0.07377
280.5	0.048723	0.074333
281	0.048708	0.07472
281.5	0.048738	0.075156
282	0.048738	0.075737
282.5	0.048784	0.076254
283	0.04889	0.076837
283.5	0.049118	0.077437
284	0.049377	0.078037
284.5	0.049711	0.078704
285	0.050122	0.079322
285.5	0.050503	0.079909
286	0.05093	0.080415
286.5	0.051236	0.080922
287	0.051587	0.081282
287.5	0.051923	0.081511
288	0.052107	0.081658
288.5	0.052474	0.081806
289	0.05275	0.081806
289.5	0.05298	0.081789
290	0.053195	0.081691
290.5	0.053348	0.081544
291	0.053486	0.081233
291.5	0.053532	0.080971
292	0.053732	0.080955
292.5	0.053671	0.08053
293	0.053793	0.080285
293.5	0.053916	0.08017
294	0.053793	0.079828
294.5	0.053947	0.079844
295	0.053916	0.079795
295.5	0.053809	0.079844
296	0.053993	0.080154
296.5	0.05387	0.080154
297	0.053993	0.080824
297.5	0.054193	0.082166
298	0.054162	0.081036
298.5	0.054316	0.081658
299	0.054301	0.082166
299.5	0.054408	0.082659
300	0.054578	0.083217
300.5	0.054916	0.083892
301	0.055194	0.084617
301.5	0.055286	0.085145
302	0.055641	0.084567
302.5	0.055687	0.083431
303	0.055949	0.083053
303.5	0.056196	0.083283
304	0.056042	0.083464
304.5	0.056505	0.084699
305	0.056521	0.084848
305.5	0.056382	0.084155
306	0.056444	0.083464
306.5	0.056166	0.082412
307	0.055949	0.08138
307.5	0.055548	0.080154
308	0.055009	0.078736
308.5	0.054701	0.077372
309	0.054255	0.07585
309.5	0.053778	0.074237
310	0.053318	0.072614
310.5	0.052781	0.071076
311	0.052229	0.06956
311.5	0.051755	0.068209
312	0.051236	0.066956
312.5	0.050579	0.065628
313	0.049985	0.064383
313.5	0.049361	0.063219
314	0.048754	0.062044
314.5	0.048207	0.061043
315	0.047586	0.06006
315.5	0.046996	0.059188
316	0.046512	0.058473
316.5	0.045923	0.057666
317	0.045456	0.057016
317.5	0.044929	0.056444
318	0.044433	0.055918
318.5	0.043997	0.055502
319	0.043486	0.05507
319.5	0.043037	0.054701
320	0.042632	0.054408
320.5	0.042198	0.054085
321	0.04181	0.053824
321.5	0.041541	0.053609
322	0.041182	0.053471
322.5	0.040884	0.053364
323	0.040571	0.05321
323.5	0.040288	0.053087
324	0.040035	0.05298
324.5	0.039797	0.052934
325	0.039559	0.052903
325.5	0.039351	0.052827
326	0.039084	0.052735
326.5	0.038905	0.052643
327	0.038623	0.052551
327.5	0.038386	0.052505
328	0.038253	0.052444
328.5	0.03809	0.052352
329	0.037912	0.05226
329.5	0.037764	0.052168
330	0.037586	0.052046
330.5	0.037453	0.051969
331	0.03732	0.051878
331.5	0.037216	0.051816
332	0.037113	0.051786
332.5	0.037083	0.051801
333	0.037039	0.051908
333.5	0.036936	0.052015
334	0.036862	0.052214
334.5	0.036817	0.052459
335	0.036832	0.05275
335.5	0.036877	0.053103
336	0.036921	0.053532
336.5	0.036965	0.05407
337	0.03698	0.054685
337.5	0.036995	0.055425
338	0.037024	0.056274
338.5	0.037143	0.057186
339	0.037364	0.058256
339.5	0.037601	0.059328
340	0.037868	0.060481
340.5	0.038075	0.061731
341	0.038253	0.063031
341.5	0.03849	0.064461
342	0.038742	0.065896
342.5	0.039084	0.067431
343	0.03941	0.068971
343.5	0.039693	0.070421
344	0.03999	0.071844
344.5	0.040303	0.073111
345	0.04072	0.074205
345.5	0.041078	0.075204
346	0.041376	0.075882
346.5	0.04172	0.076432
347	0.041914	0.076772
347.5	0.042153	0.076853
348	0.042378	0.076707
348.5	0.042512	0.076351
349	0.042662	0.075656
349.5	0.042812	0.074672
350	0.042842	0.0734
350.5	0.042857	0.07202
351	0.042797	0.070326
351.5	0.042752	0.068606
352	0.042617	0.066798
352.5	0.042438	0.064902
353	0.042228	0.063031
353.5	0.041914	0.061183
354	0.041526	0.059266
354.5	0.041182	0.057434
355	0.044042	0.053394
355.5	0.043561	0.051648
356	0.043007	0.049924
356.5	0.042378	0.04848
357	0.041705	0.047026
357.5	0.041108	0.045667
358	0.040541	0.044417
358.5	0.039975	0.043186
359	0.039544	0.042123
359.5	0.03947	0.041227
360	0.039024	0.040318
360.5	0.038594	0.039499
361	0.038179	0.038846
361.5	0.037542	0.037971
362	0.037039	0.037216
362.5	0.036507	0.036581
363	0.035961	0.035902
363.5	0.035593	0.035446
364	0.035166	0.034813
364.5	0.034784	0.034357
365	0.034313	0.033814
365.5	0.034064	0.03336
366	0.033682	0.033037
366.5	0.033199	0.032511
367	0.032701	0.03213
367.5	0.032043	0.031721
368	0.031532	0.031342
368.5	0.031094	0.031167
369	0.030715	0.030875
369.5	0.030322	0.030468
370	0.030118	0.030191
370.5	0.029842	0.029798
371	0.029522	0.02945
371.5	0.029174	0.029145
372	0.028811	0.028811
372.5	0.028434	0.028579
373	0.028043	0.028391
373.5	0.027566	0.028159
374	0.027233	0.028072
374.5	0.026814	0.02787
375	0.026627	0.027681
375.5	0.026324	0.027551
376	0.025978	0.027219
376.5	0.025647	0.027031
377	0.025301	0.026872
377.5	0.024999	0.026771
378	0.024755	0.026713
378.5	0.024496	0.026252
379	0.024281	0.026281
379.5	0.024152	0.026079
380	0.024008	0.025819
380.5	0.023779	0.02556
381	0.023578	0.025258
381.5	0.023321	0.025071
382	0.023034	0.024913
382.5	0.022848	0.024784
383	0.022662	0.024583
383.5	0.022476	0.024482
384	0.022262	0.024338
384.5	0.022234	0.024338
385	0.022005	0.024195
385.5	0.021819	0.024109
386	0.021605	0.023965
386.5	0.021449	0.023937
387	0.021263	0.023894
387.5	0.021178	0.023836
388	0.021078	0.023736
388.5	0.021021	0.023593
389	0.020907	0.023492
389.5	0.020807	0.023507
390	0.020637	0.023421
390.5	0.020551	0.023464
391	0.020452	0.023449
391.5	0.020324	0.023278
392	0.020196	0.023278
392.5	0.020053	0.023149
393	0.019897	0.023091
393.5	0.019741	0.023106
394	0.019656	0.023177
394.5	0.019514	0.023091
395	0.019471	0.023049
395.5	0.019386	0.022991
396	0.019287	0.022934
396.5	0.019088	0.02292
397	0.01896	0.022977
397.5	0.018904	0.023063
398	0.018819	0.02312
398.5	0.018719	0.023106
399	0.018691	0.023049
399.5	0.018521	0.022891
400	0.018479	0.022834
400.5	0.018295	0.022691
401	0.018238	0.022648
401.5	0.018153	0.022605
402	0.018111	0.022619
402.5	0.01804	0.022634
403	0.018082	0.022662
403.5	0.017884	0.022662
404	0.01787	0.022662
404.5	0.017814	0.022577
405	0.017842	0.022491
405.5	0.017743	0.022448
406	0.017644	0.022448
406.5	0.017531	0.022434
407	0.017432	0.022391
407.5	0.017361	0.022376
408	0.017446	0.022362
408.5	0.017305	0.022376
409	0.017178	0.022362
409.5	0.017164	0.022362
410	0.017093	0.022348
410.5	0.017051	0.022405
411	0.017037	0.022405
411.5	0.016952	0.022362
412	0.01691	0.022334
412.5	0.016825	0.022248
413	0.016783	0.022205
413.5	0.016769	0.022234
414	0.016754	0.022219
414.5	0.016684	0.022234
415	0.016656	0.022205
415.5	0.016613	0.022176
416	0.016656	0.022191
416.5	0.016571	0.022148
417	0.016515	0.022148
417.5	0.016515	0.022134
418	0.016486	0.022134
418.5	0.016444	0.022148
419	0.016374	0.022119
419.5	0.016374	0.022148
420	0.01691	0.022134
420.5	0.01691	0.022162
421	0.016895	0.022219
421.5	0.016867	0.022276
422	0.016853	0.022291
422.5	0.016797	0.022319
423	0.016783	0.022348
423.5	0.016712	0.022262
424	0.016712	0.022219
424.5	0.016656	0.022134
425	0.016656	0.022119
425.5	0.016642	0.022134
426	0.016726	0.022262
426.5	0.016656	0.022234
427	0.016656	0.022262
427.5	0.016599	0.022234
428	0.016571	0.022234
428.5	0.016557	0.022248
429	0.016529	0.022291
429.5	0.016529	0.022334
430	0.016515	0.022362
430.5	0.016515	0.022376
431	0.016501	0.022362
431.5	0.016458	0.022319
432	0.016444	0.022276
432.5	0.016416	0.022276
433	0.01636	0.022276
433.5	0.016346	0.022291
434	0.016317	0.022291
434.5	0.016331	0.022334
435	0.016331	0.022334
435.5	0.01636	0.022376
436	0.016303	0.022362
436.5	0.016303	0.022362
437	0.016317	0.022305
437.5	0.016374	0.022319
438	0.016416	0.022348
438.5	0.01643	0.022391
439	0.01643	0.022405
439.5	0.016515	0.022448
440	0.016557	0.022491
440.5	0.016543	0.022577
441	0.016515	0.022591
441.5	0.016458	0.022591
442	0.016501	0.022548
442.5	0.016472	0.022519
443	0.01643	0.022519
443.5	0.016472	0.022534
444	0.016515	0.022534
444.5	0.016501	0.022562
445	0.016501	0.022591
445.5	0.016458	0.022605
446	0.016444	0.022634
446.5	0.016388	0.022591
447	0.01636	0.022577
447.5	0.01636	0.022605
448	0.01636	0.022634
448.5	0.016374	0.022619
449	0.016486	0.022691
449.5	0.016529	0.022734
450	0.016557	0.022777
450.5	0.01643	0.022719
451	0.01636	0.022734
451.5	0.016331	0.022705
452	0.016331	0.022805
452.5	0.016331	0.022805
453	0.016374	0.022805
453.5	0.016402	0.022791
454	0.016402	0.022805
454.5	0.016331	0.022791
455	0.016331	0.022863
455.5	0.016303	0.022905
456	0.016261	0.022934
456.5	0.016247	0.022948
457	0.016233	0.022977
457.5	0.016233	0.022991
458	0.016289	0.022991
458.5	0.016374	0.023006
459	0.016374	0.022991
459.5	0.016416	0.022991
460	0.016374	0.022963
460.5	0.016317	0.022948
461	0.016289	0.02292
461.5	0.016317	0.02292
462	0.016346	0.022905
462.5	0.01636	0.022877
463	0.016388	0.02282
463.5	0.016388	0.022777
464	0.016416	0.022719
464.5	0.016374	0.022677
465	0.016374	0.022662
465.5	0.016346	0.022662
466	0.016374	0.022677
466.5	0.016388	0.022634
467	0.016416	0.022591
467.5	0.016472	0.022548
468	0.016501	0.022491
468.5	0.016458	0.022448
469	0.016388	0.022376
469.5	0.016374	0.022305
470	0.01636	0.022305
470.5	0.016346	0.022276
471	0.016317	0.022234
471.5	0.016303	0.022162
472	0.01636	0.022119
472.5	0.016374	0.022034
473	0.016402	0.022034
473.5	0.016402	0.022005
474	0.016374	0.022019
474.5	0.016374	0.021991
475	0.016388	0.021934
475.5	0.01636	0.021877
476	0.016388	0.021819
476.5	0.016374	0.021748
477	0.016402	0.021734
477.5	0.01643	0.021734
478	0.016416	0.021762
478.5	0.016416	0.021777
479	0.016374	0.021791
479.5	0.016388	0.021791
480	0.016402	0.021791
480.5	0.016402	0.021791
481	0.016444	0.021777
481.5	0.016486	0.021762
482	0.016501	0.021777
482.5	0.016529	0.021777
483	0.016529	0.021791
483.5	0.016501	0.021777
484	0.016515	0.021762
484.5	0.016529	0.021748
485	0.016529	0.021805
485.5	0.016529	0.021834
486	0.016543	0.021948
486.5	0.016571	0.021976
487	0.016613	0.021991
487.5	0.016599	0.022034
488	0.016656	0.022162
488.5	0.016627	0.022148
489	0.016656	0.022205
489.5	0.01667	0.022176
490	0.016698	0.022205
490.5	0.016712	0.022219
491	0.016797	0.022319
491.5	0.016811	0.022405
492	0.016853	0.022462
492.5	0.016853	0.022462
493	0.016839	0.022534
493.5	0.016895	0.022577
494	0.016938	0.022634
494.5	0.01698	0.022719
495	0.017022	0.022762
495.5	0.017079	0.022805
496	0.017206	0.02292
496.5	0.01722	0.02302
497	0.017277	0.023163
497.5	0.017319	0.023278
498	0.017347	0.023406
498.5	0.017361	0.023478
499	0.017418	0.023578
499.5	0.017418	0.023707
500	0.017503	0.023836
500.5	0.017559	0.023937
501	0.01763	0.024066
501.5	0.017686	0.024195
502	0.017757	0.024353
502.5	0.017799	0.024525
503	0.01787	0.024683
503.5	0.017927	0.024812
504	0.017997	0.024999
504.5	0.018054	0.025157
505	0.018125	0.025388
505.5	0.018238	0.025618
506	0.018323	0.025834
506.5	0.018422	0.026064
507	0.018465	0.026295
507.5	0.018521	0.026511
508	0.018606	0.026728
508.5	0.018677	0.02693
509	0.018776	0.027219
509.5	0.018918	0.027465
510	0.019031	0.027725
510.5	0.019102	0.028014
511	0.019173	0.028289
511.5	0.019216	0.028478
512	0.019301	0.028666
512.5	0.019372	0.028768
513	0.0195	0.028942
513.5	0.019585	0.029145
514	0.019684	0.029392
514.5	0.019755	0.029595
515	0.019883	0.029798
515.5	0.019982	0.029987
516	0.020082	0.030147
516.5	0.020167	0.030293
517	0.020267	0.030453
517.5	0.020381	0.03057
518	0.02048	0.030701
518.5	0.020608	0.030773
519	0.020708	0.030861
519.5	0.020807	0.030934
520	0.020864	0.030963
520.5	0.020907	0.030963
521	0.020978	0.03089
521.5	0.021064	0.030817
522	0.021149	0.030686
522.5	0.021235	0.030599
523	0.021292	0.030482
523.5	0.021349	0.030307
524	0.02142	0.030162
524.5	0.021477	0.029915
525	0.02152	0.029697
525.5	0.021548	0.029479
526	0.021534	0.029232
526.5	0.021563	0.029
527	0.021591	0.028768
527.5	0.021591	0.028521
528	0.021605	0.028304
528.5	0.021634	0.028014
529	0.021605	0.027783
529.5	0.021634	0.02758
530	0.021634	0.027407
530.5	0.02162	0.027219
531	0.02162	0.02706
531.5	0.021634	0.026887
532	0.021648	0.026742
532.5	0.021634	0.026555
533	0.021634	0.026468
533.5	0.02162	0.026382
534	0.021634	0.026309
534.5	0.021648	0.026281
535	0.021663	0.026252
535.5	0.021663	0.026223
536	0.02172	0.026252
536.5	0.02172	0.026223
537	0.021748	0.026223
537.5	0.021762	0.026281
538	0.021805	0.026338
538.5	0.021848	0.026454
539	0.021891	0.026612
539.5	0.021976	0.026786
540	0.021976	0.026858
540.5	0.022148	0.027118
541	0.022262	0.027291
541.5	0.022262	0.027421
542	0.022476	0.02771
542.5	0.022519	0.027826
543	0.022734	0.028087
543.5	0.022905	0.028347
544	0.022891	0.028507
544.5	0.023206	0.028898
545	0.023278	0.029159
545.5	0.023435	0.029464
546	0.023535	0.029769
546.5	0.023636	0.030206
547	0.023793	0.030613
547.5	0.02398	0.031036
548	0.024123	0.031546
548.5	0.024181	0.032116
549	0.024252	0.03273
549.5	0.024267	0.03336
550	0.024338	0.033888
550.5	0.024482	0.034548
551	0.024583	0.035137
551.5	0.024755	0.035799
552	0.025114	0.036655
552.5	0.025244	0.037276
553	0.025474	0.038119
553.5	0.025776	0.039084
554	0.025992	0.040005
554.5	0.026396	0.041167
555	0.026598	0.042168
555.5	0.026843	0.043276
556	0.027291	0.044628
556.5	0.027421	0.045773
557	0.027739	0.047132
557.5	0.028087	0.048556
558	0.028347	0.05
558.5	0.028797	0.051709
559	0.029159	0.053379
559.5	0.029551	0.055317
560	0.030002	0.057387
560.5	0.030337	0.059452
561	0.03073	0.061684
561.5	0.031182	0.064021
562	0.031648	0.066386
562.5	0.032101	0.068796
563	0.032511	0.071156
563.5	0.032876	0.073641
564	0.033184	0.076044
564.5	0.03355	0.078574
565	0.033961	0.080987
565.5	0.034401	0.08325
566	0.034754	0.085459
566.5	0.035122	0.087529
567	0.035564	0.089459
567.5	0.036035	0.091398
568	0.036374	0.09311
568.5	0.036891	0.094828
569	0.037172	0.096063
569.5	0.037468	0.097046
570	0.037853	0.097725
570.5	0.038105	0.098065
571	0.038431	0.098269
571.5	0.038787	0.098116
572	0.038965	0.097606
572.5	0.039321	0.097063
573	0.039499	0.096113
573.5	0.039604	0.094896
574	0.039797	0.093631
574.5	0.039856	0.092085
575	0.039961	0.090477
575.5	0.040035	0.088809
576	0.04002	0.087031
576.5	0.040139	0.085293
577	0.040139	0.083349
577.5	0.04008	0.08138
578	0.040094	0.07942
578.5	0.04002	0.077453
579	0.039961	0.075591
579.5	0.039633	0.073529
580	0.040094	0.071604
580.5	0.040184	0.069911
581	0.039797	0.067843
581.5	0.039618	0.065991
582	0.039351	0.064162
582.5	0.039098	0.062529
583	0.038816	0.061105
583.5	0.038445	0.059452
584	0.038371	0.058147
584.5	0.037882	0.056536
585	0.037512	0.054962
585.5	0.037231	0.053778
586	0.036847	0.052459
586.5	0.036581	0.051297
587	0.036212	0.050016
587.5	0.036537	0.048799
588	0.035873	0.047919
588.5	0.035431	0.046603
589	0.035151	0.045546
589.5	0.034931	0.044568
590	0.034563	0.043471
590.5	0.034372	0.042617
591	0.034049	0.0416
591.5	0.033814	0.04069
592	0.033682	0.039886
592.5	0.03333	0.03895
593	0.033096	0.038149
593.5	0.032891	0.037424
594	0.032628	0.03667
594.5	0.032394	0.035991
595	0.03213	0.035254
595.5	0.031882	0.034548
596	0.031648	0.033888
596.5	0.031473	0.033242
597	0.031196	0.032642
597.5	0.030934	0.032028
598	0.030628	0.031459
598.5	0.030351	0.030919
599	0.030089	0.030409
599.5	0.029871	0.029915
600	0.02958	0.029421
600.5	0.029305	0.028956
601	0.029058	0.028536
601.5	0.028768	0.028087
602	0.02855	0.027696
602.5	0.02826	0.027262
603	0.028043	0.026915
603.5	0.027826	0.026555
604	0.027508	0.02618
604.5	0.027306	0.025877
605	0.027031	0.025517
605.5	0.026757	0.025186
606	0.026468	0.024884
606.5	0.026209	0.024583
607	0.025992	0.02431
607.5	0.025762	0.024066
608	0.025503	0.023779
608.5	0.02533	0.023578
609	0.025057	0.023392
609.5	0.024827	0.023206
610	0.024654	0.02302
610.5	0.024425	0.022834
611	0.024224	0.022662
611.5	0.023994	0.022462
612	0.023865	0.022276
612.5	0.023679	0.022062
613	0.023478	0.021891
613.5	0.023263	0.021705
614	0.023063	0.02152
614.5	0.022848	0.02132
615	0.022677	0.021121
615.5	0.022491	0.020964
616	0.022276	0.020793
616.5	0.022119	0.020651
617	0.021962	0.020523
617.5	0.021791	0.020366
618	0.02162	0.02021
618.5	0.021449	0.020053
619	0.021278	0.019926
619.5	0.021092	0.019784
620	0.020907	0.019641
620.5	0.020765	0.019528
621	0.020608	0.019429
621.5	0.020466	0.019329
622	0.020309	0.01923
622.5	0.020167	0.019145
623	0.020011	0.01906
623.5	0.019869	0.018946
624	0.019727	0.018805
624.5	0.019585	0.018705
625	0.019429	0.01862
625.5	0.019301	0.018493
626	0.019173	0.018408
626.5	0.019046	0.018337
627	0.018918	0.018252
627.5	0.01879	0.018167
628	0.018663	0.018111
628.5	0.018549	0.018068
629	0.018408	0.017997
629.5	0.018295	0.017969
630	0.018167	0.017927
630.5	0.018026	0.017941
631	0.017898	0.017913
631.5	0.017799	0.017856
632	0.0177	0.017828
632.5	0.017587	0.017842
633	0.017489	0.017856
633.5	0.01739	0.017842
634	0.017305	0.017828
634.5	0.017192	0.017814
635	0.017107	0.017856
635.5	0.017008	0.017913
636	0.016924	0.017969
636.5	0.016839	0.018012
637	0.016769	0.01804
637.5	0.016684	0.018096
638	0.016599	0.018167
638.5	0.016515	0.018238
639	0.01643	0.018295
639.5	0.01636	0.01838
640	0.016303	0.018465
640.5	0.016261	0.018521
641	0.016191	0.018606
641.5	0.016148	0.018649
642	0.016092	0.018705
642.5	0.016022	0.018719
643	0.015979	0.018719
643.5	0.015909	0.018748
644	0.015881	0.018762
644.5	0.015824	0.018719
645	0.015768	0.018677
645.5	0.015712	0.018578
646	0.01567	0.018521
646.5	0.015599	0.018422
647	0.015543	0.018309
647.5	0.015487	0.018224
648	0.015445	0.018139
648.5	0.015402	0.017983
649	0.01536	0.01787
649.5	0.015332	0.017729
650	0.01529	0.017602
650.5	0.015248	0.017474
651	0.015191	0.017333
651.5	0.015163	0.017164
652	0.015135	0.016994
652.5	0.015107	0.016825
653	0.015079	0.01667
653.5	0.015037	0.016543
654	0.015009	0.016416
654.5	0.014967	0.016289
655	0.014925	0.016176
655.5	0.014896	0.016064
656	0.014854	0.015979
656.5	0.014812	0.015881
657	0.014784	0.015782
657.5	0.014728	0.015684
658	0.014686	0.015557
658.5	0.01463	0.01543
659	0.014574	0.015318
659.5	0.014517	0.015206
660	0.014475	0.015093
660.5	0.014419	0.015023
661	0.014377	0.014925
661.5	0.014335	0.014868
662	0.014265	0.01484
662.5	0.014223	0.01477
663	0.014167	0.014672
663.5	0.014125	0.014588
664	0.014083	0.014461
664.5	0.014041	0.014405
665	0.013998	0.014335
665.5	0.013928	0.014265
666	0.013858	0.014209
666.5	0.013802	0.014153
667	0.013746	0.014069
667.5	0.013704	0.014012
668	0.013648	0.013942
668.5	0.01362	0.01383
669	0.013578	0.013746
669.5	0.013522	0.013634
670	0.013466	0.013578
670.5	0.01341	0.013536
671	0.013354	0.013452
671.5	0.013312	0.01341
672	0.013256	0.013354
672.5	0.0132	0.013312
673	0.013144	0.013284
673.5	0.013102	0.013256
674	0.01306	0.013228
674.5	0.013004	0.013214
675	0.012963	0.013172
675.5	0.012907	0.01313
676	0.012851	0.013088
676.5	0.012837	0.013032
677	0.012795	0.013004
677.5	0.012753	0.012976
678	0.012711	0.012907
678.5	0.012669	0.012865
679	0.012613	0.012781
679.5	0.012557	0.012739
680	0.012529	0.012669
680.5	0.012487	0.012627
681	0.012459	0.012599
681.5	0.012418	0.012585
682	0.01239	0.012543
682.5	0.012348	0.012515
683	0.012306	0.012515
683.5	0.012264	0.012529
684	0.012222	0.012515
684.5	0.012194	0.012501
685	0.012138	0.012445
685.5	0.012096	0.012431
686	0.012041	0.012404
686.5	0.011999	0.01239
687	0.011957	0.01239
687.5	0.011929	0.012404
688	0.011901	0.012376
688.5	0.011859	0.012376
689	0.011831	0.01239
689.5	0.011817	0.01239
690	0.011762	0.012376
690.5	0.011734	0.01239
691	0.011692	0.01239
691.5	0.011664	0.01239
692	0.011622	0.01239
692.5	0.011594	0.012404
693	0.011594	0.012431
693.5	0.01158	0.012445
694	0.011539	0.012431
694.5	0.011497	0.012445
695	0.011455	0.012431
695.5	0.011441	0.012431
696	0.011427	0.012418
696.5	0.011399	0.012418
697	0.011399	0.012418
697.5	0.011399	0.012418
698	0.011371	0.012376
698.5	0.011357	0.012362
699	0.01133	0.01232
699.5	0.011288	0.012334
700	0.01126	0.012292
700.5	0.011232	0.012306
701	0.011232	0.012306
701.5	0.011204	0.012306
702	0.01119	0.012278
702.5	0.011162	0.012292
703	0.011149	0.012278
703.5	0.011135	0.01225
704	0.011107	0.012236
704.5	0.011093	0.012222
705	0.011079	0.012222
705.5	0.011065	0.01218
706	0.011051	0.012152
706.5	0.011065	0.012124
707	0.011079	0.01211
707.5	0.011065	0.012096
708	0.011037	0.012082
708.5	0.011023	0.012082
709	0.010981	0.012082
709.5	0.010954	0.012082
710	0.010926	0.012055
710.5	0.010926	0.012055
711	0.010912	0.012096
711.5	0.010898	0.012069
712	0.010898	0.012055
712.5	0.010898	0.012069
713	0.010884	0.01211
713.5	0.01087	0.012138
714	0.010842	0.012096
714.5	0.010828	0.012096
715	0.010828	0.012055
715.5	0.010828	0.012027
716	0.010828	0.012041
716.5	0.010828	0.01211
717	0.010842	0.01211
717.5	0.010828	0.01211
718	0.010814	0.012096
718.5	0.010801	0.012096
719	0.010787	0.012124
719.5	0.010773	0.01211
720	0.010731	0.012096
720.5	0.010731	0.01211
721	0.010745	0.012138
721.5	0.010745	0.012138
722	0.010745	0.012124
722.5	0.010731	0.012138
723	0.010731	0.012124
723.5	0.010703	0.012124
724	0.010689	0.01211
724.5	0.010689	0.012096
725	0.010703	0.01211
725.5	0.010717	0.012124
726	0.010731	0.012138
726.5	0.010759	0.012166
727	0.010731	0.01218
727.5	0.010703	0.01218
728	0.010689	0.012194
728.5	0.010675	0.012194
729	0.010675	0.012166
729.5	0.010661	0.012166
730	0.010661	0.012124
730.5	0.010703	0.012124
731	0.010717	0.01211
731.5	0.010731	0.012082
732	0.010689	0.012055
732.5	0.010675	0.012082
733	0.010675	0.012069
733.5	0.010689	0.012069
734	0.010675	0.012055
734.5	0.010703	0.012055
735	0.010717	0.012027
735.5	0.010745	0.012055
736	0.010731	0.012041
736.5	0.010717	0.012082
737	0.010703	0.012096
737.5	0.010661	0.012082
738	0.010661	0.012055
738.5	0.010661	0.012055
739	0.010675	0.012027
739.5	0.010689	0.012041
740	0.010731	0.012013
740.5	0.010759	0.012055
741	0.010745	0.012069
741.5	0.010745	0.012069
742	0.010717	0.012096
742.5	0.010703	0.012124
743	0.010717	0.012096
743.5	0.010731	0.012096
744	0.010731	0.01211
744.5	0.010759	0.012138
745	0.010773	0.01218
745.5	0.010773	0.012194
746	0.010759	0.012222
746.5	0.010745	0.01225
747	0.010731	0.012278
747.5	0.010717	0.012278
748	0.010717	0.012278
748.5	0.010731	0.01232
749	0.010731	0.012362
749.5	0.010759	0.01239
750	0.010759	0.012376
750.5	0.010773	0.01239
751	0.010745	0.01239
751.5	0.010731	0.01239
752	0.010731	0.01239
752.5	0.010745	0.012418
753	0.010745	0.01239
753.5	0.010787	0.012418
754	0.010828	0.012404
754.5	0.010856	0.012445
755	0.010884	0.012473
755.5	0.010884	0.012515
756	0.010842	0.012529
756.5	0.010842	0.012543
757	0.010828	0.012557
757.5	0.010828	0.012571
758	0.010828	0.012627
758.5	0.01087	0.012655
759	0.010898	0.012669
759.5	0.01094	0.012655
760	0.01094	0.012641
760.5	0.01094	0.012627
761	0.01094	0.012641
761.5	0.010954	0.012641
762	0.010954	0.012669
762.5	0.010968	0.012683
763	0.010968	0.012669
763.5	0.010995	0.012739
764	0.011037	0.012753
764.5	0.011023	0.012823
765	0.011009	0.012893
765.5	0.010995	0.012879
766	0.010981	0.012851
766.5	0.010981	0.012865
767	0.010995	0.012879
767.5	0.011009	0.012949
768	0.011051	0.012976
768.5	0.011093	0.013046
769	0.011107	0.013116
769.5	0.011135	0.013158
770	0.011107	0.013186
770.5	0.011079	0.013228
771	0.011065	0.0132
771.5	0.011065	0.013214
772	0.011093	0.013214
772.5	0.011135	0.013256
773	0.011162	0.013298
773.5	0.01119	0.01334
774	0.011162	0.013368
774.5	0.011149	0.013396
775	0.011121	0.01341
775.5	0.011121	0.01341
776	0.011107	0.013396
776.5	0.011107	0.013424
777	0.011121	0.013452
777.5	0.011176	0.01348
778	0.011218	0.013508
778.5	0.011246	0.013592
779	0.01126	0.013578
779.5	0.011246	0.013578
780	0.011232	0.01355
780.5	0.01126	0.013536
781	0.011274	0.013522
781.5	0.011302	0.013522
782	0.011357	0.013536
782.5	0.011385	0.013578
783	0.011399	0.01362
783.5	0.011385	0.013634
784	0.011344	0.01362
784.5	0.011316	0.013676
785	0.01133	0.013676
785.5	0.011371	0.013676
786	0.011371	0.013676
786.5	0.011413	0.013718
787	0.011469	0.013774
787.5	0.011525	0.013858
788	0.011539	0.013928
788.5	0.011553	0.013984
789	0.011553	0.014012
789.5	0.011566	0.01397
790	0.011553	0.01397
790.5	0.011566	0.014041
791	0.011608	0.014111
791.5	0.011678	0.014181
792	0.011734	0.014251
792.5	0.011776	0.014419
793	0.01179	0.014545
793.5	0.011762	0.01463
794	0.011776	0.014728
794.5	0.011776	0.014798
795	0.011803	0.014854
795.5	0.011803	0.01491
796	0.011845	0.015009
796.5	0.011915	0.015093
797	0.011943	0.015248
797.5	0.011999	0.015374
798	0.012027	0.015515
798.5	0.012041	0.015613
799	0.012027	0.015613
799.5	0.012069	0.015712
800	0.012069	0.015768
800.5	0.012124	0.015867
801	0.012236	0.015993
801.5	0.012278	0.016134
802	0.012334	0.016261
802.5	0.012376	0.016444
803	0.012404	0.016571
803.5	0.012404	0.016656
804	0.012404	0.01674
804.5	0.012445	0.016881
805	0.012487	0.017051
805.5	0.012543	0.017192
806	0.012613	0.017319
806.5	0.012655	0.017517
807	0.012683	0.017757
807.5	0.012711	0.017941
808	0.012739	0.018026
808.5	0.012823	0.018167
809	0.012837	0.01828
809.5	0.012893	0.018408
810	0.012963	0.018564
810.5	0.013032	0.018719
811	0.013116	0.01889
811.5	0.013172	0.019046
812	0.013186	0.019216
812.5	0.013214	0.019386
813	0.013228	0.019571
813.5	0.013298	0.019684
814	0.013368	0.01984
814.5	0.013438	0.019997
815	0.013564	0.020167
815.5	0.013648	0.020381
816	0.013648	0.020551
816.5	0.013718	0.020765
817	0.013746	0.021007
817.5	0.013788	0.021149
818	0.013844	0.021335
818.5	0.0139	0.02152
819	0.013984	0.021677
819.5	0.014083	0.021848
820	0.014167	0.021934
820.5	0.014251	0.022119
821	0.014335	0.022348
821.5	0.014363	0.022548
822	0.014419	0.022719
822.5	0.014461	0.022877
823	0.014531	0.02302
823.5	0.014602	0.023163
824	0.014672	0.023378
824.5	0.014784	0.023593
825	0.014854	0.02375
825.5	0.014967	0.023965
826	0.014995	0.024138
826.5	0.015065	0.024281
827	0.015107	0.024453
827.5	0.015206	0.024626
828	0.015262	0.024697
828.5	0.015346	0.024856
829	0.01543	0.025014
829.5	0.015543	0.025215
830	0.015627	0.025359
830.5	0.015712	0.02556
831	0.015768	0.025704
831.5	0.015839	0.025819
832	0.015895	0.025891
832.5	0.016007	0.026021
833	0.016078	0.026108
833.5	0.016162	0.026309
834	0.016247	0.026425
834.5	0.016346	0.026612
835	0.016458	0.026858
835.5	0.016529	0.027074
836	0.016571	0.027219
836.5	0.016684	0.027436
837	0.016783	0.027624
837.5	0.016839	0.027783
838	0.016938	0.027942
838.5	0.017051	0.028174
839	0.017135	0.028333
839.5	0.017192	0.028565
840	0.01722	0.028768
840.5	0.017305	0.028956
841	0.017404	0.029116
841.5	0.01746	0.02929
842	0.017573	0.029493
842.5	0.017658	0.029668
843	0.017743	0.029828
843.5	0.017814	0.029973
844	0.01787	0.030133
844.5	0.017969	0.030307
845	0.01804	0.030468
845.5	0.018139	0.03057
846	0.018167	0.030584
846.5	0.018266	0.030642
847	0.018309	0.030715
847.5	0.01838	0.030744
848	0.018436	0.030817
848.5	0.018521	0.030861
849	0.018578	0.030875
849.5	0.018663	0.030846
850	0.018691	0.03089
850.5	0.018762	0.030905
851	0.018861	0.030803
851.5	0.018946	0.030744
852	0.019003	0.030599
852.5	0.019102	0.030453
853	0.019159	0.030293
853.5	0.019216	0.030089
854	0.019287	0.029886
854.5	0.019358	0.029682
855	0.019386	0.029464
855.5	0.019443	0.029232
856	0.019457	0.028956
856.5	0.019528	0.028681
857	0.019571	0.028362
857.5	0.01967	0.028058
858	0.019712	0.027725
858.5	0.019755	0.027407
859	0.019798	0.027074
859.5	0.01984	0.026728
860	0.019883	0.026396
860.5	0.01994	0.026036
861	0.019954	0.025632
861.5	0.019982	0.025244
862	0.019982	0.024841
862.5	0.019982	0.024439
863	0.019997	0.024066
863.5	0.020011	0.023679
864	0.020011	0.023278
864.5	0.020053	0.022905
865	0.020053	0.022519
865.5	0.020096	0.022162
866	0.020096	0.021791
866.5	0.020082	0.021463
867	0.02011	0.021135
867.5	0.020125	0.020822
868	0.02011	0.020537
868.5	0.020125	0.020253
869	0.020125	0.020011
869.5	0.020139	0.019784
870	0.020125	0.019571
870.5	0.020096	0.019372
871	0.02011	0.019187
871.5	0.020125	0.019017
872	0.020125	0.018861
872.5	0.02011	0.018719
873	0.020068	0.018592
873.5	0.020068	0.018465
874	0.020053	0.018351
874.5	0.020025	0.018266
875	0.020011	0.018196
875.5	0.020011	0.018111
876	0.019968	0.018054
876.5	0.019968	0.018026
877	0.01994	0.017997
877.5	0.019911	0.017983
878	0.01984	0.017927
878.5	0.019769	0.017913
879	0.019741	0.017898
879.5	0.019712	0.01787
880	0.019656	0.017828
880.5	0.019641	0.017799
881	0.019613	0.017771
881.5	0.019585	0.017743
882	0.019528	0.0177
882.5	0.019514	0.017672
883	0.019471	0.017644
883.5	0.019443	0.017602
884	0.019372	0.017559
884.5	0.019329	0.017503
885	0.019287	0.017446
885.5	0.019244	0.017375
886	0.019202	0.017305
886.5	0.019159	0.01722
887	0.019102	0.01715
887.5	0.01906	0.017079
888	0.019003	0.017008
888.5	0.018946	0.016952
889	0.018918	0.016881
889.5	0.01889	0.016825
890	0.018847	0.01674
890.5	0.018819	0.016698
891	0.01879	0.016627
891.5	0.018734	0.016585
892	0.018677	0.016543
892.5	0.018663	0.016501
893	0.01862	0.016472
893.5	0.01862	0.016444
894	0.018564	0.016402
894.5	0.018564	0.016388
895	0.018521	0.01636
895.5	0.018521	0.016388
896	0.018479	0.016388
896.5	0.01845	0.016402
897	0.01845	0.016416
897.5	0.018408	0.016444
898	0.018337	0.01643
898.5	0.018323	0.016472
899	0.018337	0.016529
899.5	0.018323	0.016613
900	0.018295	0.016712
900.5	0.01828	0.016825
901	0.018238	0.016966
901.5	0.018224	0.017107
902	0.018196	0.017262
902.5	0.018167	0.017432
903	0.018167	0.017559
903.5	0.018167	0.017729
904	0.018196	0.017884
904.5	0.018224	0.01804
905	0.018252	0.018224
905.5	0.018252	0.018394
906	0.018266	0.018564
906.5	0.018295	0.018776
907	0.018309	0.018975
907.5	0.018351	0.019187
908	0.018408	0.019414
908.5	0.018507	0.019627
909	0.018578	0.01984
909.5	0.01862	0.020039
910	0.01862	0.020253
910.5	0.018663	0.020452
911	0.018691	0.020637
911.5	0.018762	0.02085
912	0.01879	0.021035
912.5	0.018875	0.021221
913	0.018989	0.021406
913.5	0.019102	0.02162
914	0.019216	0.021819
914.5	0.019301	0.022048
915	0.019358	0.022234
915.5	0.019429	0.022391
916	0.0195	0.022505
916.5	0.019571	0.022648
917	0.019698	0.022777
917.5	0.019826	0.022934
918	0.019968	0.023063
918.5	0.020082	0.023177
919	0.020167	0.023292
919.5	0.020238	0.023349
920	0.020295	0.023435
920.5	0.020352	0.023521
921	0.020437	0.023578
921.5	0.020523	0.02365
922	0.020608	0.023664
922.5	0.020779	0.023722
923	0.020936	0.023765
923.5	0.021064	0.023808
924	0.021206	0.023865
924.5	0.021263	0.023908
925	0.021335	0.023965
925.5	0.021406	0.023994
926	0.021491	0.024008
926.5	0.021634	0.024037
927	0.021791	0.02408
927.5	0.021991	0.024166
928	0.022134	0.024267
928.5	0.022291	0.024396
929	0.022391	0.024525
929.5	0.022476	0.024654
930	0.022577	0.024798
930.5	0.022677	0.024942
931	0.022805	0.0251
931.5	0.02302	0.025316
932	0.023134	0.025503
932.5	0.023349	0.025733
933	0.023521	0.025992
933.5	0.023693	0.026252
934	0.023736	0.026526
934.5	0.023851	0.026843
935	0.023965	0.02719
935.5	0.024066	0.027493
936	0.024252	0.027826
936.5	0.024439	0.028188
937	0.02464	0.028565
937.5	0.02487	0.029014
938	0.024971	0.02945
938.5	0.025086	0.029944
939	0.025172	0.030409
939.5	0.025316	0.030905
940	0.025431	0.03143
940.5	0.025575	0.031955
941	0.025805	0.032584
941.5	0.026064	0.033286
942	0.026295	0.034005
942.5	0.026555	0.034739
943	0.02667	0.03549
943.5	0.026843	0.036242
944	0.027002	0.037039
944.5	0.027204	0.037868
945	0.027436	0.038712
945.5	0.027667	0.039663
946	0.027898	0.04066
946.5	0.02826	0.041824
947	0.028449	0.043007
947.5	0.028652	0.044177
948	0.028826	0.045426
948.5	0.029029	0.046724
949	0.029232	0.048071
949.5	0.029508	0.049529
950	0.029842	0.050991
950.5	0.030133	0.052643
951	0.030497	0.054378
951.5	0.030803	0.056181
952	0.031109	0.058085
952.5	0.031371	0.060091
953	0.031619	0.062216
953.5	0.031853	0.064461
954	0.032145	0.066813
954.5	0.032496	0.06929
955	0.032906	0.071988
955.5	0.033316	0.074914
956	0.033697	0.078021
956.5	0.03402	0.08138
957	0.034299	0.084716
957.5	0.034578	0.088277
958	0.034887	0.092035
958.5	0.035195	0.095859
959	0.035593	0.099821
959.5	0.035976	0.103818
960	0.036389	0.108079
960.5	0.036891	0.112594
961	0.03732	0.117262
961.5	0.037601	0.122089
962	0.037897	0.126934
962.5	0.038179	0.131907
963	0.038445	0.137086
963.5	0.038772	0.142498
964	0.039128	0.147978
964.5	0.039574	0.153856
965	0.039931	0.159796
965.5	0.040348	0.165897
966	0.040601	0.172066
966.5	0.040929	0.1782
967	0.041197	0.184298
967.5	0.041556	0.19044
968	0.04181	0.196607
968.5	0.042213	0.202711
969	0.042632	0.20888
969.5	0.043067	0.215182
970	0.043396	0.221464
970.5	0.043742	0.227747
971	0.044027	0.23382
971.5	0.044252	0.239601
972	0.044508	0.24515
972.5	0.044778	0.250529
973	0.045079	0.255634
973.5	0.045396	0.260601
974	0.045727	0.265525
974.5	0.046104	0.270228
975	0.046422	0.27465
975.5	0.046663	0.278679
976	0.046905	0.2822
976.5	0.047147	0.285382
977	0.047404	0.288061
977.5	0.047707	0.290412
978	0.048056	0.292323
978.5	0.048404	0.293869
979	0.048723	0.294992
979.5	0.049103	0.295715
980	0.049392	0.295903
980.5	0.049681	0.295796
981	0.049924	0.295206
981.5	0.050168	0.294243
982	0.050442	0.292882
982.5	0.050671	0.291181
983	0.050915	0.289169
983.5	0.051114	0.286877
984	0.051388	0.284232
984.5	0.051694	0.281317
985	0.051954	0.278241
985.5	0.052214	0.275084
986	0.052383	0.271773
986.5	0.052597	0.268361
987	0.052811	0.264875
987.5	0.053026	0.261294
988	0.05321	0.257643
988.5	0.053486	0.254072
989	0.053671	0.250529
989.5	0.05387	0.247016
990	0.054101	0.243602
990.5	0.05427	0.240261
991	0.054424	0.236947
991.5	0.054593	0.233703
992	0.054701	0.230484
992.5	0.054824	0.227312
993	0.054932	0.224185
993.5	0.055055	0.22108
994	0.055209	0.217976
994.5	0.055379	0.215004
995	0.055548	0.212119
995.5	0.055672	0.209319
996	0.05578	0.206559
996.5	0.055918	0.203859
997	0.056027	0.20122
997.5	0.056104	0.198596
998	0.056181	0.196052
998.5	0.056274	0.193566
999	0.056397	0.191262
999.5	0.056536	0.189075
1000	0.056583	0.187045
